# Supplementary material
Source: PubMed Central journal article supplement (PMC3547521)
Supplement: NIHMS418630-supplement-1.pdf [file NIHMS418630-supplement-1.pdf]

|                   | everolimus<br>(n=33)                 | placebo<br>(n=34)                    |
|-------------------|--------------------------------------|--------------------------------------|
| Female:male       | 16:17 (48.5%)                        | 17:17 (50.0%)                        |
| Age at first dose | 31 days (26-34)                      | 30 days (26-34)                      |
| Weight            | 14.77g (12-20)                       | 15.07g (11-21)                       |
| WCC               | 11.84 ± 0.93<br>x10 <sup>3</sup> /uL | 12.46 ± 0.59<br>x10 <sup>3</sup> /uL |

**Supplementary Table S1. Baseline characteristics of E<sub>μ</sub>-Myc mice randomized to receive everolimus or placebo.** Sex, average age and range, average weight and range and average white cell count with SEM of mice in the everolimus and placebo groups. There were no statistically significant differences between the groups at baseline.

**Supplementary Table S2. Primer sequences (5' -3') used for qPCR expression analysis in B220+/- sorted cells.**

| <b>Amplicon</b> | <b>Forward Sequence</b>    | <b>Reverse Sequence</b> |
|-----------------|----------------------------|-------------------------|
| ICAM1           | GGGACCACGGAGCCAATT         | TTGCGGCCTGAGATCCA       |
| IGFBP2          | AGCATGGCCGGTACAACCT        | CGCGCTGTCCGTTTCCAGA     |
| IGFBP7          | TCCCAACCCCTGTCCTCAT        | CCGCTGAACTCCAGAGTGATC   |
| IL6             | CCACGGCCTTCCCTACTTC        | TTGGGAGTGGTATCCTCTGTGA  |
| ATG7            | CCTGGCAGCCCACAGATG         | CCCGAAAGCAGAGGACTTCA    |
| BNIP3L          | CCGCTGGCCTCAACAGTT         | TTGCCATTGCTGCTGTTTCAT   |
| p62             | GGAGGCACCCCGAAACA          | GCCCGTTGCAACCATCAC      |
| WIP11           | TGGCCGCTATCACCTTCAAC       | CTTTTTCAGACGCGCTTGCT    |
| GADD45          | GCTGGTGACGAACCCACATT       | CCCGGC AAAAACAATAAGTTG  |
| p21             | CCAGACATTGAGAGCCACAGG      | GGTCGGACATCACCAGGATT    |
| VIMENTIN        | AGCTGCTAACTACCAGGACACTATTG | CGAAGGTGACGAGCCATCTC    |
