# Supplementary material
Source: PubMed Central journal article supplement (PMC3547521)
Supplement: NIHMS418630-supplement-4.pdf [file NIHMS418630-supplement-4.pdf]

# Supplementary Figure S7

**A**

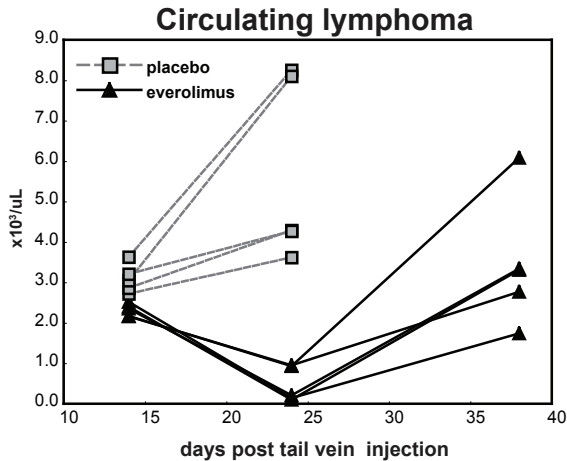

**B**

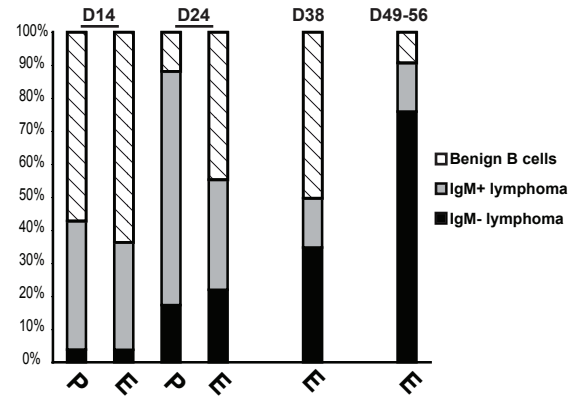

**C**

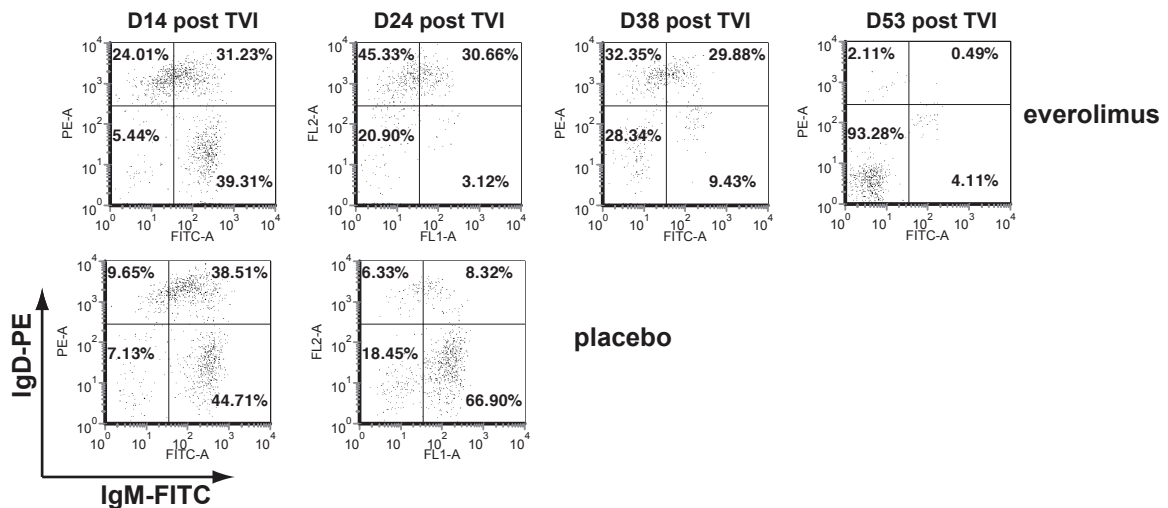

**Supplementary Figure S7. Everolimus resistance is associated with changes to the surface immunophenotype.** (A-C) Syngeneic mice were injected with E $\mu$ -Myc lymphoma cells (tumor#299). Dosing with placebo (P) or everolimus (E) commenced on day 14 with the onset of overt malignancy (n=5 mice/group). Surviving mice were bled 14, 24 and 38 days after tail vein injection of tumor cells. 4/5 mice given everolimus were also rebled immediately prior to sacrifice (between day 49 and day 56). (A) Circulating tumor burden of mice 14, 24 and 38 days after tumor injection. (B) Average percentage of circulating B220+ B-cells in the benign (surface (s) IgM+, sIgDhi), and the IgM+ (sIgM+, sIgDlo) and IgM- lymphoma (sIgM-/sIgD-) gates at the indicated day (D) after tumor injection. (C) FACS plots showing IgM and IgD expression in B220+ B-cells in the blood of representative mice at the indicated D post tail vein injection (TVI).

# Supplementary Figure S8

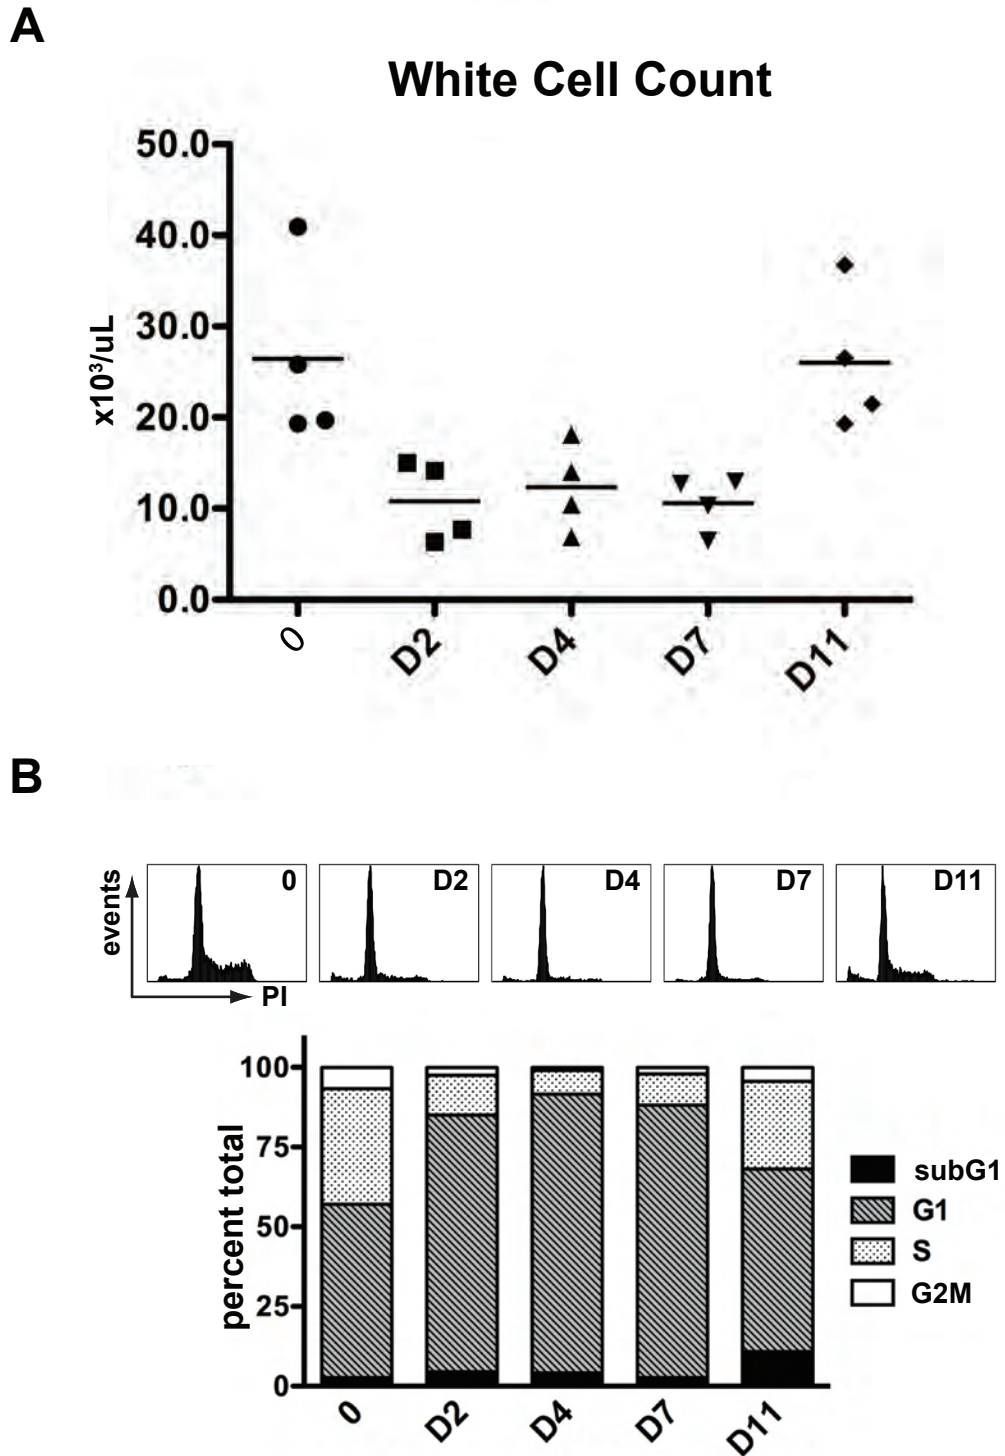

**Supplementary Figure S8. Continued daily dosing with everolimus results in G1 cell cycle arrest.** (A and B) Syngeneic mice were injected with E $\mu$ -Myc lymphoma cells (tumor#299), treated with once daily with everolimus after the development of overt malignancy and analyzed after 0, 2, 4, 7 and 11 days (D) of therapy (n=4 mice per group). (A) White cell counts. (B) Representative DNA histograms (top panel) and the average percentage of cells in each phase of the cell cycle (bottom panel) in fixed PI stained tumors.
