# Supplementary material
Source: PubMed Central journal article supplement (PMC3547521)
Supplement: NIHMS418630-supplement-6.pdf [file NIHMS418630-supplement-6.pdf]

# Supplementary Figure S12

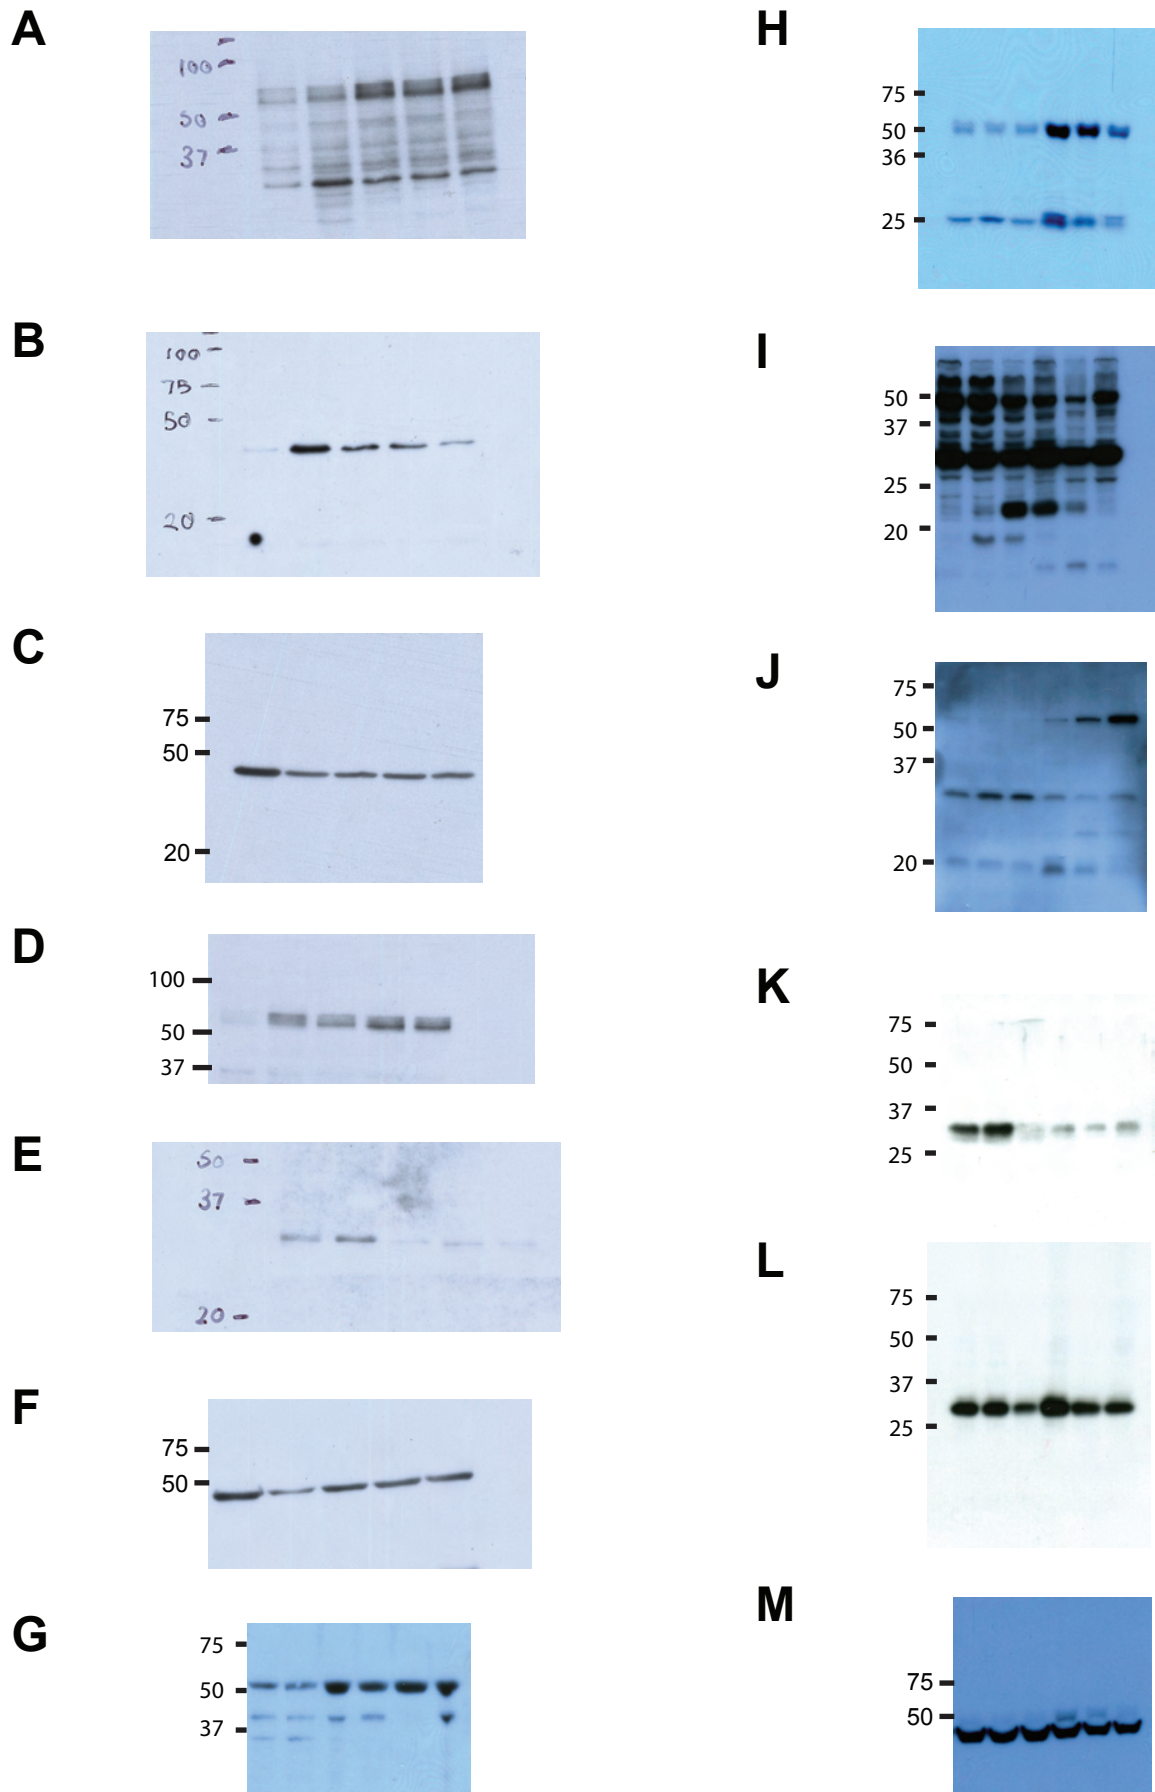

**Supplementary Figure S12. Full length Western blots. (A-F).** Full-length Western blots presented in Figure 3. **(A)** MYC, **(B)** P-RPS6 and **(C)** actin in BM B220+ lymphocytes. **(D)** MYC, **(E)** P-RPS6 and **(F)** actin in B220+ splenocytes. **(G-M)** Full-length Western blots presented in Figure 6: **(G)** P-S15, **(H)** total p53, **(I)** p21, **(J)** p19ARF, **(K)** P-RPS6, **(L)** total RPS6 and **(M)** actin in tumor lysates.
